# Supplementary material
Source: PubMed Central journal article supplement (PMC7759148)
Supplement: NIHMS1603489-supplement-1.pdf [file NIHMS1603489-supplement-1.pdf]

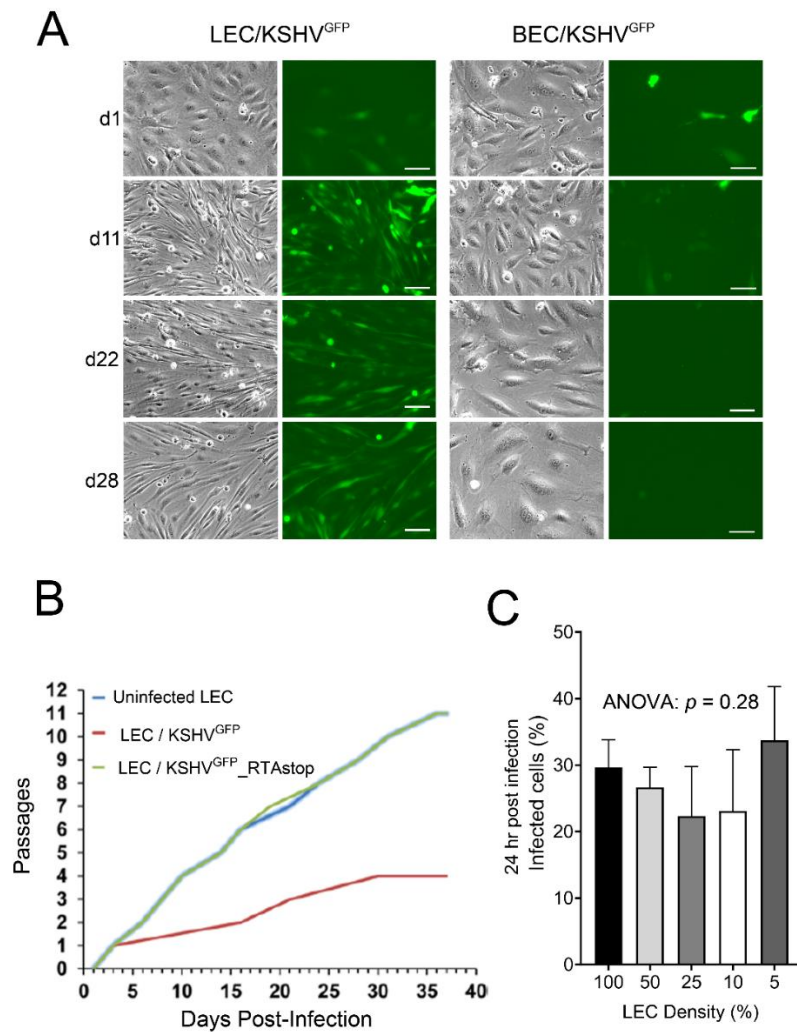

**Supplemental Figure 1. Sustained KSHV maintenance and massive cell death in KSHV-infected LECs.** (A) Primary human dermal LECs and BECs derived from the same donors were infected with KSHV<sup>GFP</sup>. Bright-field and fluorescent images were captured at 1, 11, 22, and 28 days post-infection. Scale bars, 50  $\mu$ m. Comparable results were obtained from three sets of same donor derived LECs and BECs. (B) KSHV-infected LECs undergo significant cell death due to lytic cell lysis, and thus significantly delayed cell passaging time. LECs were infected with KSHV<sup>GFP</sup> or KSHV<sup>GFP</sup>\_RTAstop (RTA-deficient KSHV mutant). Uninfected cells were also cultured in parallel as a control. Cells were passaged after reaching ~100% confluence at a ratio of 1:3. While uninfected LECs and KSHV<sup>GFP</sup>\_RTAstop-infected LECs show a similar population growth rate, KSHV<sup>GFP</sup>-infection of LECs decelerated culture passaging due to massive cell lysis. (C) KSHV infectivity remains unchanged regardless of initial LEC density at the time of infection. LECs at different confluency were infected with KSHV<sup>RG</sup> (MOI=0.5) and after 24 hours, the percentage of infected K-LECs were determined by flow cytometer. No statistical difference was detected among LEC cultures with different confluency.
