# Supplementary material
Source: PubMed Central journal article supplement (PMC7759148)
Supplement: NIHMS1603489-supplement-2.pdf [file NIHMS1603489-supplement-2.pdf]

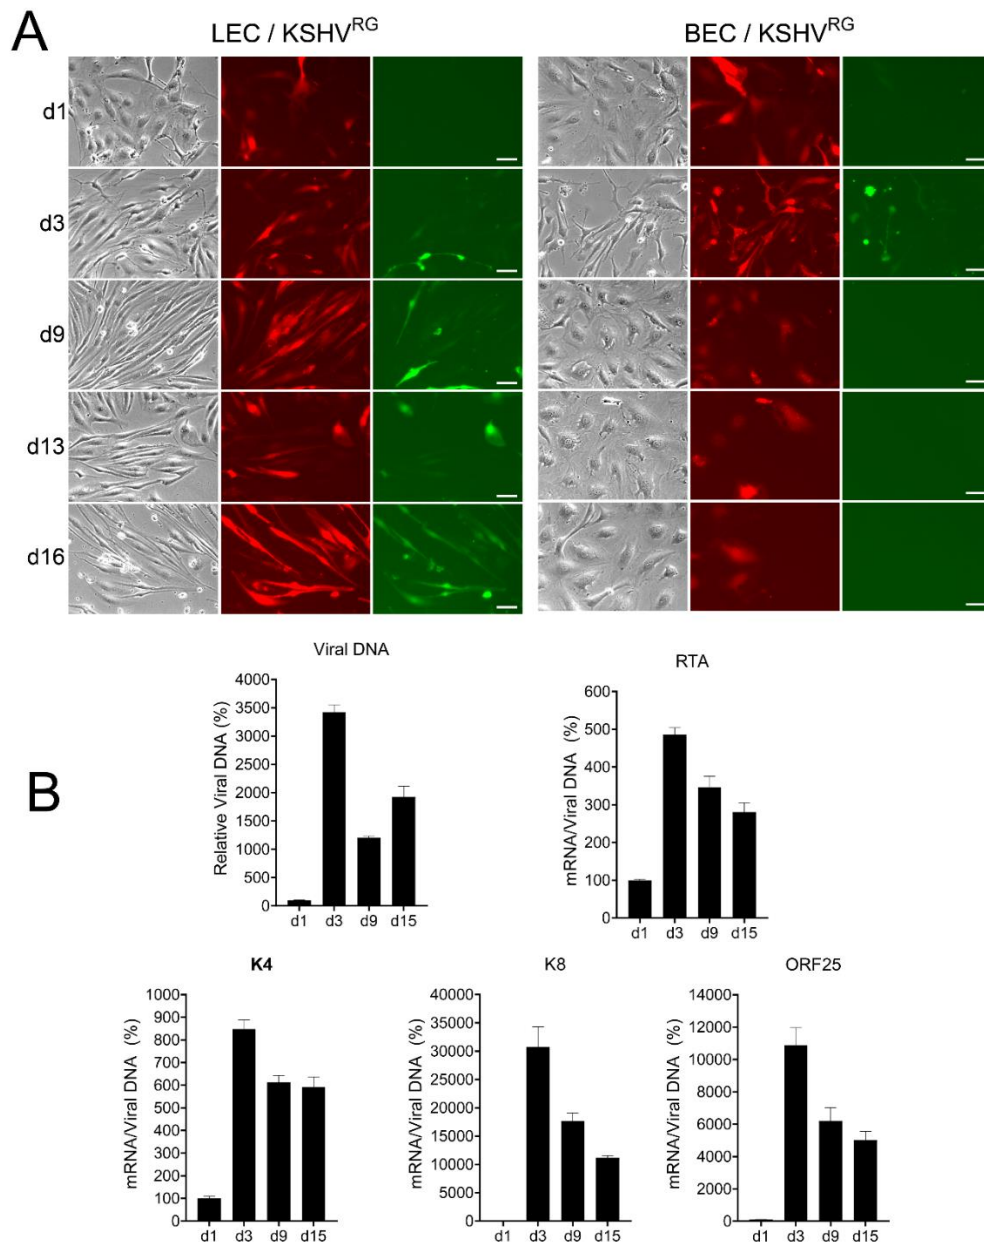

**Supplemental Figure 2. Different infection pattern between LECs and BECs.** (A) Same donor derived LECs and BECs were infected with KSHV<sup>RG</sup>. Bright-field and fluorescent images were captured at the indicated days post-infection to visualize all KSHV-infected cells (red) and the lytic-stage cells (green). Three sets of donor derived LECs and BECs were tested with comparable results. Scale bars, 50  $\mu$ m. (B) Primary LECs were infected with KSHV<sup>GFP</sup> and cultured for 1, 3, 9, and 15 days in virus-free media. Total viral DNA copy number and the expression of RTA, K4, K8, and ORF25 were determined by qPCR or qRT-PCR assays. Gene expression level was normalized by viral genome copy numbers.
