# Supplementary material
Source: PubMed Central journal article supplement (PMC7759148)
Supplement: NIHMS1603489-supplement-3.pdf [file NIHMS1603489-supplement-3.pdf]

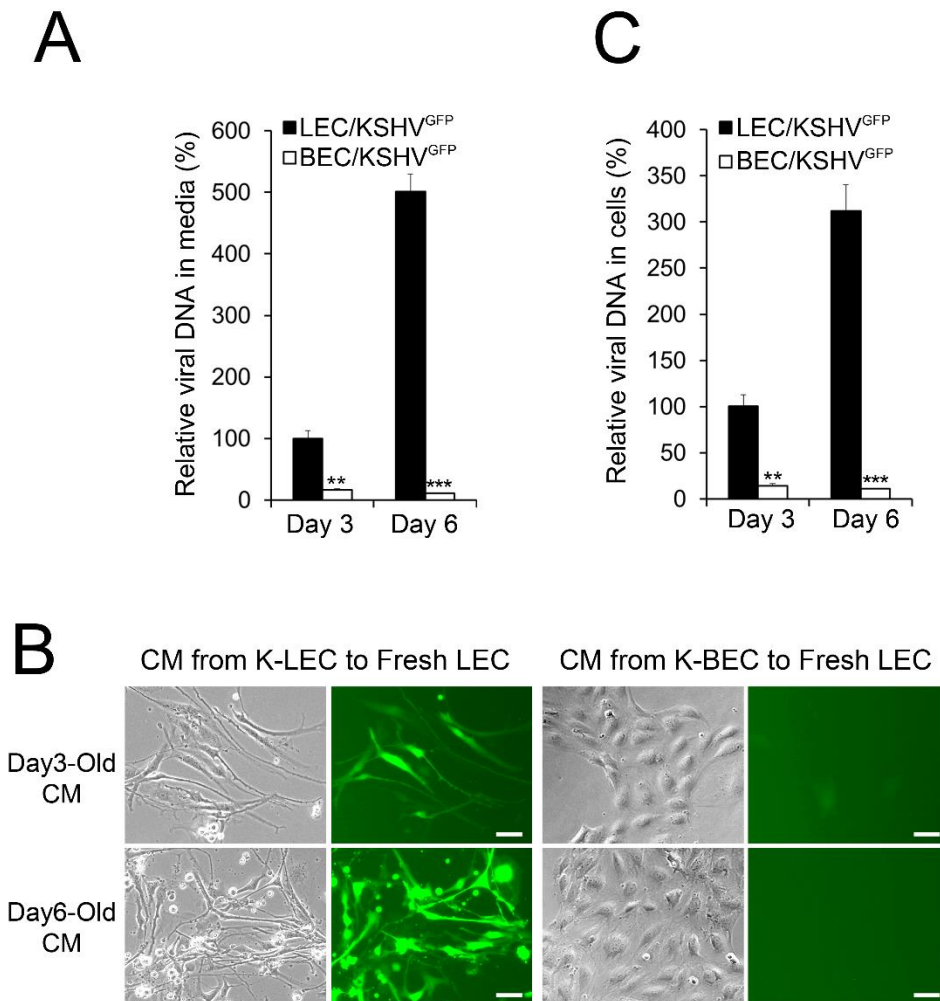

**Supplemental Figure 3. Productive Lytic Replication in LECs, but not in BECs.** Primary LECs and BECs were infected with KSHV<sup>GFP</sup> for 24 hours, washed with PBS three times, and incubated with virus-free media for additional 3 or 6 days (total 4- or 7-days post-infection). **(A)** Culture media were then subjected to qPCR assays to measure the total copy number of the viral genome present in media. **(B)** Culture media (CM) were also transferred to new LEC culture for *de novo* infection, and images were taken after 2 days. **(C)** Subsequently, the *de novo* infected cells were subjected to qPCR analyses to measure the total viral DNA copy number. Scale bars, 50  $\mu$ m. Statistics, 2-tailed *t*-test, \*,  $p < 0.05$ ; \*\*,  $p < 0.01$ ; \*\*\*,  $p < 0.001$ .
