# Supplementary material
Source: PubMed Central journal article supplement (PMC7759148)
Supplement: NIHMS1603489-supplement-4.pdf [file NIHMS1603489-supplement-4.pdf]

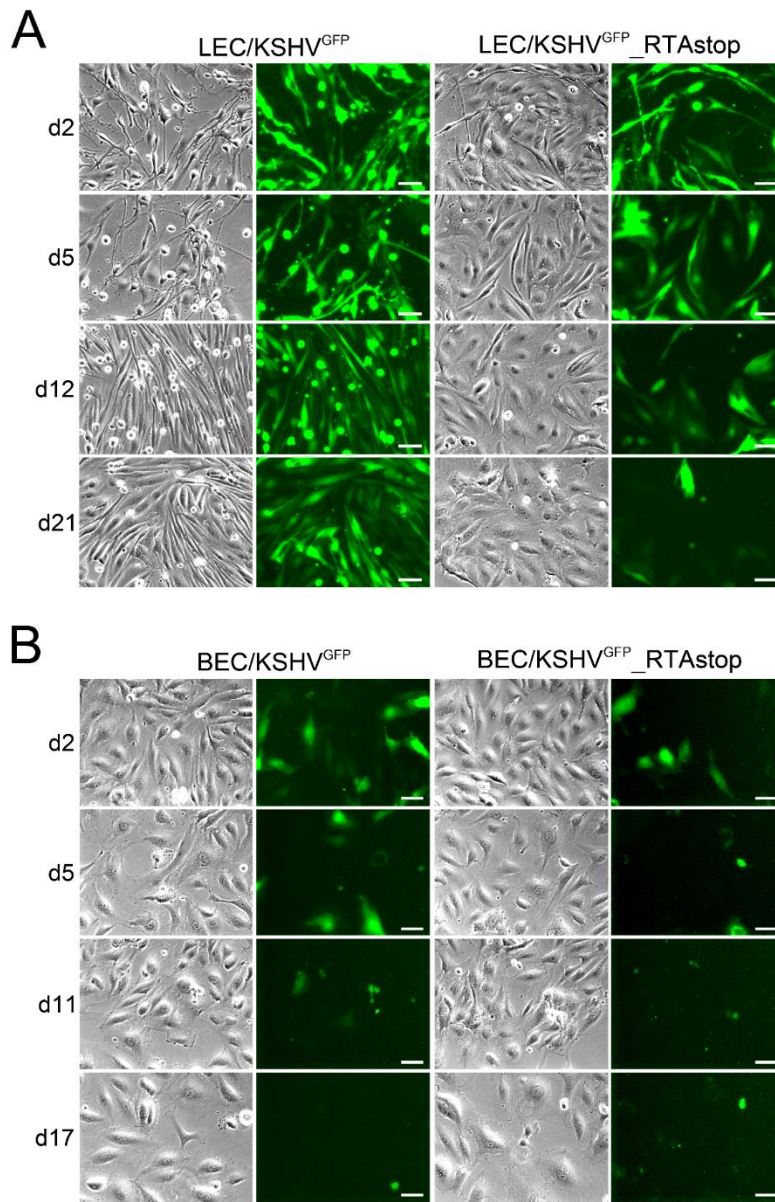

**Supplemental Figure 4. RTA gene is required for KSHV viral maintenance in LECs.** Primary LECs (**A**) and BECs (**B**) were infected with KSHV<sup>GFP</sup> or KSHV<sup>GFP</sup>\_RTAstop, and bright-field and fluorescence images were captured at indicated time points post-infection.
