# Supplementary material
Source: PubMed Central journal article supplement (PMC7759148)
Supplement: NIHMS1603489-supplement-5.pdf [file NIHMS1603489-supplement-5.pdf]

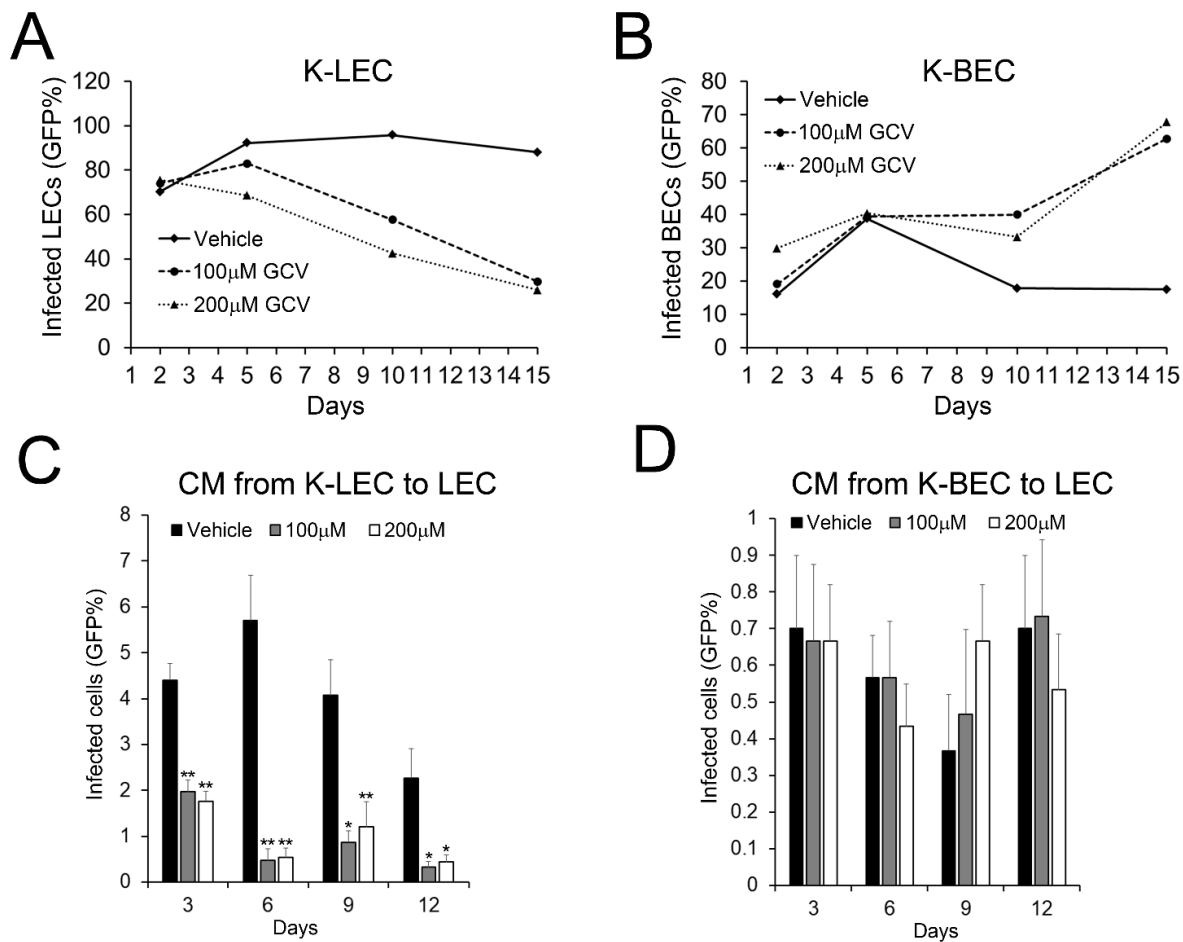

**Supplemental Figure 5. Lytic DNA replication is essential for persistent KSHV infection in LECs. (A,B)** Primary LECs (A) and BECs (B) were pre-treated with Ganciclovir (GCV) at 0 (vehicle), 100, or 200  $\mu$ M final concentration for 10 minutes prior to KSHV<sup>GFP</sup> infection. The percentage of GFP-positive cells among all cells was measured by flow cytometer at 2, 5, 10, and 15 days post-infection. (C,D) Culture media (CM) collected from K-LECs (C) or K-BECs (D) cultured in the presence of Ganciclovir (GCV) at 0 (vehicle), 100, or 200  $\mu$ M for 3, 6, 9, and 12 days post-infection were added onto fresh primary LECs. After 2 days, the percentage of GFP-positive cells among all cells was measured by flow cytometer.
