# Supplementary material
Source: PubMed Central journal article supplement (PMC7759148)
Supplement: NIHMS1603489-supplement-6.pdf [file NIHMS1603489-supplement-6.pdf]

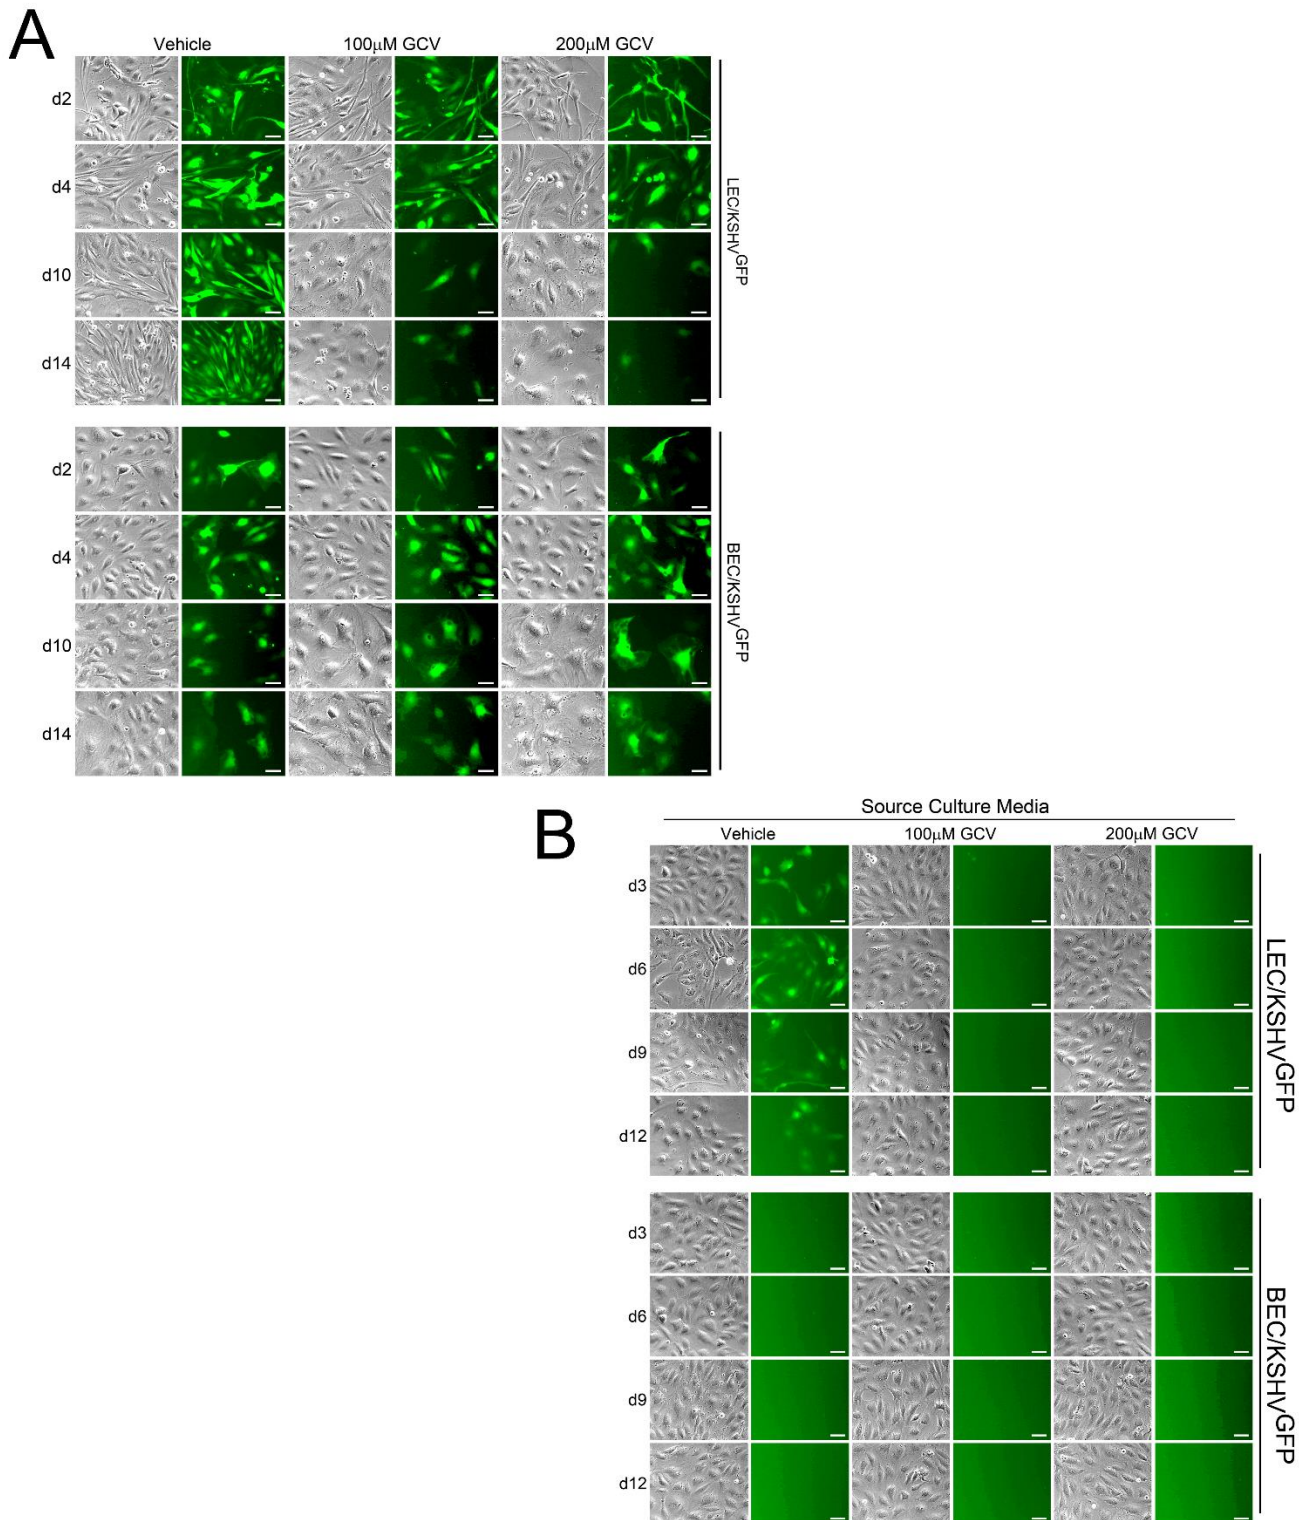

**Supplemental Figure 6. Productive KSHV Lytic Replication Is Necessary for Sustained Infection in LECs.** **(A)** LECs and BECs were treated with Ganciclovir (GCV) at 0, 100, or 200  $\mu$ M final concentration at 10 minutes before infected with KSHV<sup>GFP</sup>. Bright-field and fluorescent images were captured at the indicated days post-infection to visualize infected cells. **(B)** K-LECs or K-BECs were cultured in culture media containing Ganciclovir (GCV) at 0 (vehicle), 100, or 200  $\mu$ M final concentration. The culture media were collected at 3, 6, 9, and 12 days post-infection and added onto uninfected LECs for *de novo* infection. The cells were incubated for 2 days before taking bright-field and fluorescent images to visualize *de novo* infected cells.
