# Supplementary material
Source: PubMed Central journal article supplement (PMC7759148)
Supplement: NIHMS1603489-supplement-7.pdf [file NIHMS1603489-supplement-7.pdf]

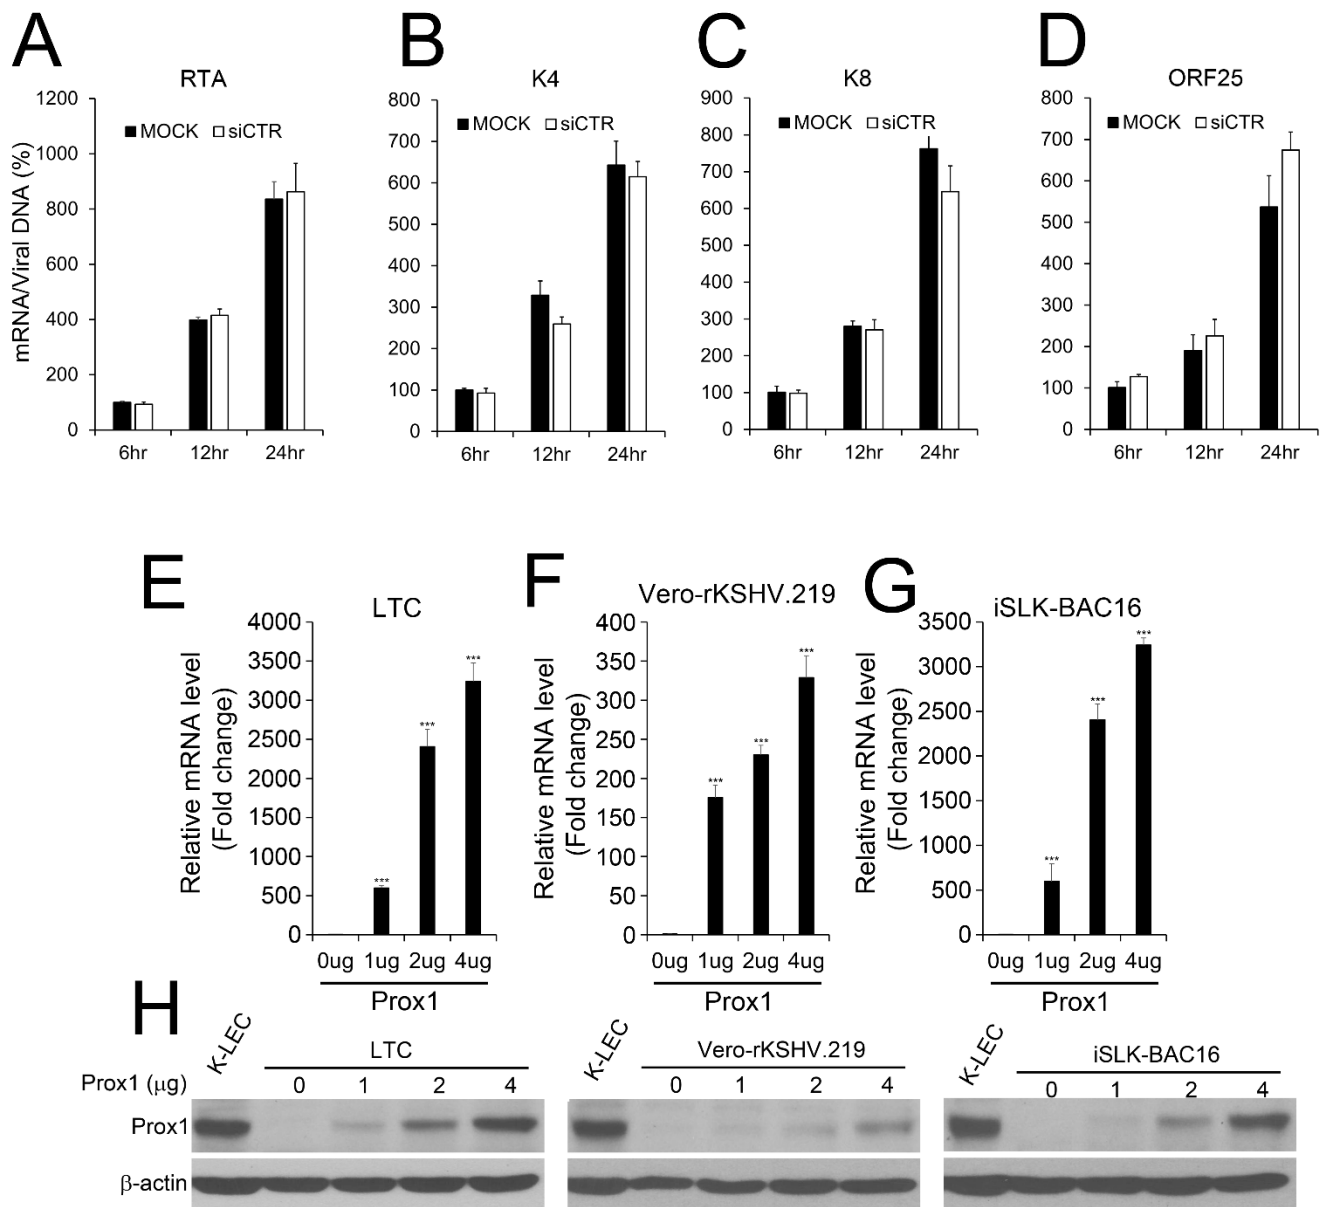

**Supplemental Figure 7. Quantitation of the expressions of the viral genes and Prox1.** (A-D) Scramble siRNA did not affect KSHV lytic gene expression in LECs. LECs were transfected with scrambled siRNA (siCTR) or left untransfected for 24 hours before infected with KSHV<sup>GFP</sup> for 6, 12, and 24 hours. Viral genome copy number and the expression of KSHV lytic genes, RTA (A), K4 (B), K8 (C), and OFR25 (D) were determined by real-time quantitative PCR or RT-PCR assays. Gene expression level was normalized by genome copy numbers. Statistics, s-tailed *t*-test  $p > 0.05$ . (E-G) Ectopic Expression of Prox1 in KSHV cell lines; qRT-PCR data showing the expression of Prox1 in LTC (E), Vero-rKSHV.219 (F), and iSLK-BAC16 (G) cells at 3 days after transfected with a Prox1 expressing vector. Each cell line was transfected with a total 4 µg DNA mixture consisting of a control vector and a Prox1 vector. The Prox1 vector was used either 0, 1, 2, or 4 µg. (H) Western blot analyses showing Prox1 expression level. K-LEC, KSHV-infected LECs at 3 days post-infection. Statistical values: \*,  $p < 0.05$ ; \*\*,  $p < 0.01$ ; \*\*\*,  $p < 0.001$ .
