# Supplementary material
Source: PubMed Central journal article supplement (PMC7759148)
Supplement: NIHMS1603489-supplement-8.pdf [file NIHMS1603489-supplement-8.pdf]

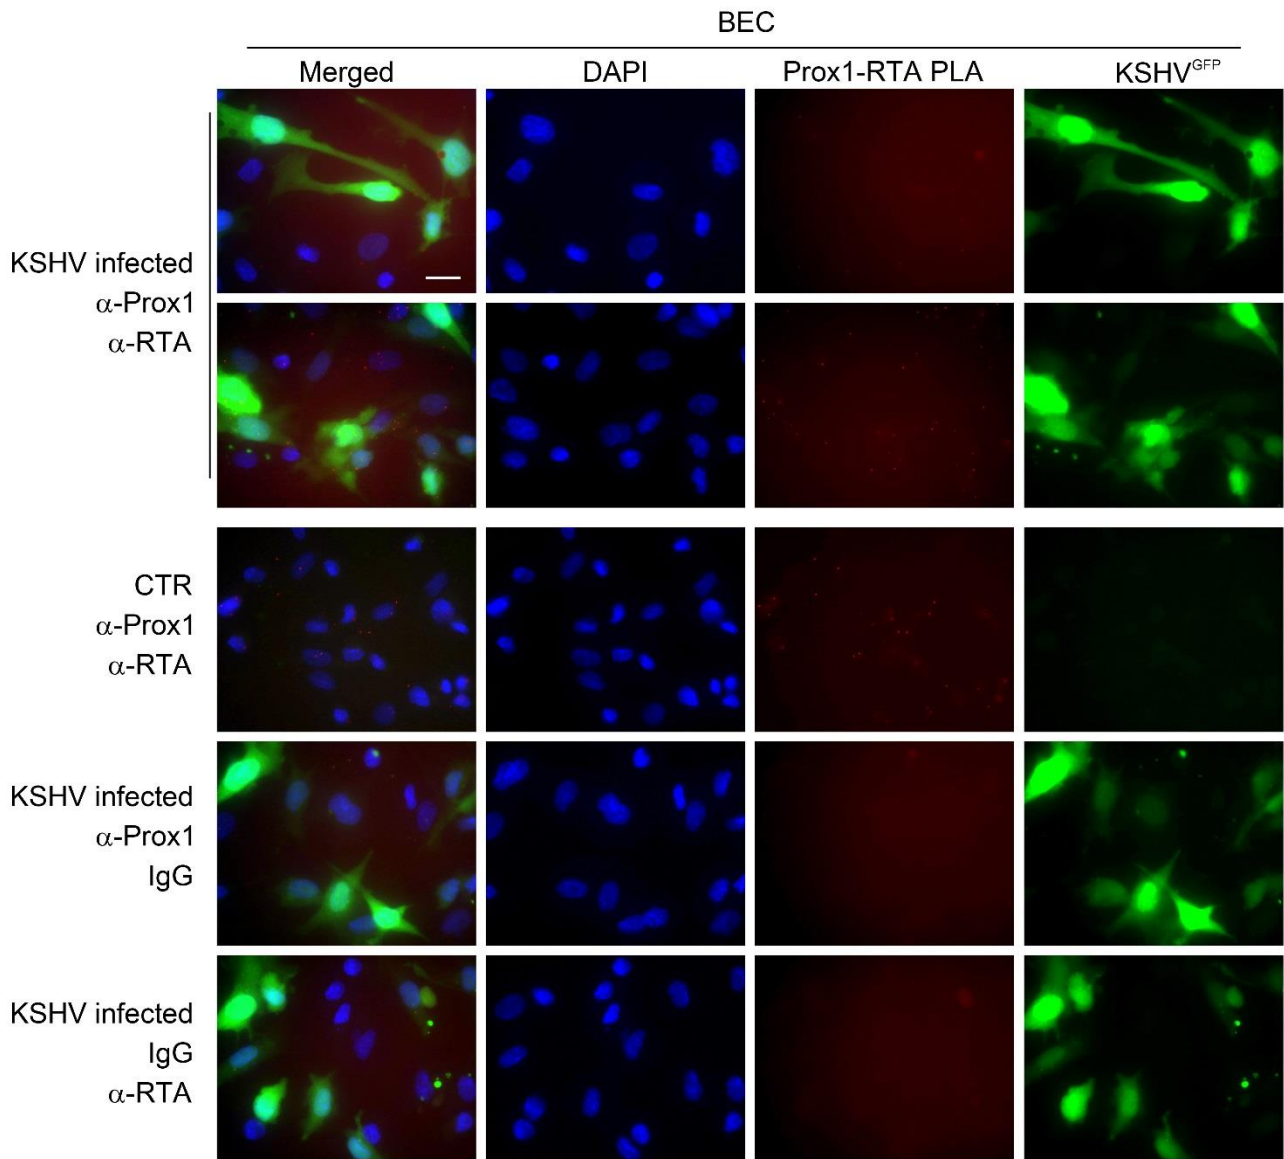

**Supplemental Figure 8. Interaction of Prox1 and RTA was not detected in K-BECs.** BECs were infected with KSHV<sup>GFP</sup>, and Proximity Ligation Assay (PLA) was performed for Prox1 and RTA at 2 days after infection. PLA signal was not detected in K-BECs.
